# Supplementary material for: Kaposi’s Sarcoma Lesion Progression in BKV-Tat Transgenic Mice Is Increased by Inflammatory Cytokines and Blocked by Treatment with Anti-Tat Antibodies
Source: MDPI journal article supplement (doi:10.3390/ijms23042081), 2022-02-14
Supplement: s1 [file s1]

**Supplementary materials**

**Figure S1. Time course of single-lesion severity in IC-treated mice with measurable KS-like lesions or no lesions.**

BKV/Tat transgenic mice bearing initial lesions or no lesions were treated with IC at 0, 4, 8 days as described in Methods (4 mice). The Figure shows the single lesion severity over time of the IC-treated mice already presented in Figure 2.

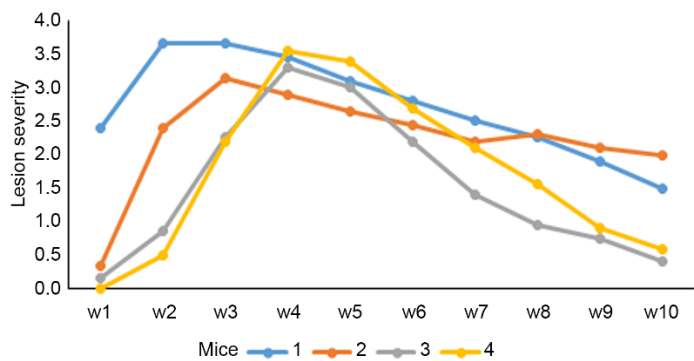

**Table S1. Early-stage versus late-stage anti-Tat Ab treated lesions progressing to a score  $\geq 3$  over the monitoring course.**

|                                   | n/N  | %     |
|-----------------------------------|------|-------|
| Early-stage anti-Tat Ab treatment | 1/7  | 14.29 |
| Late-stage anti-Tat Ab treatment  | 6/8  | 75.00 |
| Early-stage control-Ab treatment  | 4/10 | 40.00 |
| Late-stage control-Ab treatment   | 3/5  | 60.00 |

IC-treated (day 0, 4, 8) mice with early-stage (score  $\leq 0.5$ ) or late-stage (score  $\geq 1$ ) KS-like lesions were inoculated with anti-Tat Abs or control Abs (day 4, 8, 12). Mice were monitored twice/week and lesion severity scored up to week 12. The Table shows the number and percentage of mice progressed to a score  $\geq 3$  over the monitoring course.
